# Supplementary material for: Common protein-altering variant in GFAP is associated with white matter lesions in the older Japanese population
Source: PubMed Central journal article supplement — NPJ Genom Med. 2024 Nov 13;9:59. doi: 10.1038/s41525-024-00431-x (PMC11561265; doi:10.1038/s41525-024-00431-x), 2024-11-13
Supplement: 41525_2024_431_MOESM1_ESM.pdf [file 41525_2024_431_MOESM1_ESM.pdf]

## Consortia

### the JPSC-AD study group

Toshiharu Ninomiya<sup>1,6</sup>, Jun Hata<sup>6,8</sup>, Mao Shibata<sup>1,4,6</sup>, Takanori Honda<sup>1</sup>, Tomoyuki Ohara<sup>1,7</sup>,  
Masato Akiyama<sup>3</sup>, Shigeyuki Nakaji<sup>14</sup>, Koichi Murashita<sup>21</sup>, Tatsuya Mikami<sup>21</sup>, Kaori Sawada<sup>21</sup>,  
Shintaro Yokoyama<sup>21</sup>, Tetsuya Maeda<sup>15</sup>, Naoki Ishizuka<sup>15</sup>, Hiroshi Akasaka<sup>15</sup>, Yasuo  
Terayama<sup>22</sup>, Hisashi Yonezawa<sup>23</sup>, Junko Takahashi<sup>24</sup>, Kenjiro Ono<sup>16</sup>, Moeko Noguchi-  
Shinohara<sup>16</sup>, Kazuo Iwasa<sup>25</sup>, Sohshi Yuki-Nozaki<sup>25</sup>, Masahito Yamada<sup>26</sup>, Masaru Mimura<sup>17</sup>,  
Shogyoku Bun<sup>27</sup>, Hidehito Niimura<sup>27</sup>, Ryo Shikimoto<sup>27</sup>, Hisashi Kida<sup>27</sup>, Kenji Nakashima<sup>18</sup>,  
Yasuyo Fukada<sup>18</sup>, Hisanori Kowa<sup>18</sup>, Toshiya Nakano<sup>18</sup>, Kenji Wada<sup>28</sup>, Masafumi Kishi<sup>29</sup>,  
Tomoki Ozaki<sup>19</sup>, Ayumi Tachibana<sup>19</sup>, Yuta Yoshino<sup>19</sup>, Jun-ichi Iga<sup>19</sup>, Shu-ichi Ueno<sup>19</sup>, Minoru  
Takebayashi<sup>20</sup>, Tomohisa Ishikawa<sup>30</sup>, Seiji Yuki<sup>31</sup>, Ryuji Fukuhara<sup>31</sup>, Asuka Koyama<sup>32</sup>,  
Mamoru Hashimoto<sup>33</sup>, Manabu Ikeda<sup>34</sup>, Yoshihiro Kokubo<sup>35</sup>, Kazuhiro Uchida<sup>36</sup>, Midori  
Esaki<sup>36</sup>, Yasuyuki Taki<sup>13</sup>, Yasuko Tatewaki<sup>13</sup>, Benjamin Thyreau<sup>13</sup>, Koji Yonemoto<sup>37</sup>, Hisako  
Yoshida<sup>38</sup>, Kaori Muto<sup>39</sup>, Yusuke Inoue<sup>39</sup>, Izen Ri<sup>39</sup>, Yukihide Momozawa<sup>12</sup>, Chikashi  
Terao<sup>9,10,11</sup>, Michiaki Kubo<sup>40</sup>, and Yutaka Kiyohara<sup>40</sup>.

Affiliations:

21. Hirosaki University, Hirosaki, Japan.

22. Shonan Keiiku Hospital, Fujisawa, Japan.
23. Department of Neurology, Japanese Red Cross Morioka Hospital, Morioka, Japan.
24. Department of Neurology, Kitakami Saiseikai Hospital, Kitakami, Japan.
25. Kanazawa University, Kanazawa, Japan.
26. Kudanzaka Hospital, Tokyo, Japan.
27. Keio University School of Medicine, Tokyo, Japan.
28. Kawasaki Medical School, Kurashiki, Japan.
29. Tottori Red Cross Hospital, Tottori, Japan.
30. Department of Psychiatry, Arao Kokoronosato Hospital, Arao, Japan.
31. Kumamoto University, Kumamoto, Japan.
32. Faculty of Social Welfare, Kumamoto Gakuen University, Kumamoto, Japan
33. Department of Neuropsychiatry, Kindai University Faculty of Medicine, Osaka-Sayama,  
Japan.
34. Department of Psychiatry, Graduate School of Medicine, Osaka University, Suita, Japan
35. National Cerebral and Cardiovascular Center, Suita, Japan.
36. Department of Health Promotion, School of Health and Nutrition Sciences, Nakamura-  
Gakuen University, Fukuoka, Japan.
37. Division of Biostatistics, School of Health Sciences, Faculty of Medicine, University of the

Ryukyus, Nishihara, Japan.

38. Department of Medical Statistics, Osaka Metropolitan University Graduate School of  
Medicine, Osaka, Japan.

39. Department of Public Policy, The Institute of Medical Science, The University of Tokyo,  
Tokyo, Japan.

40. Hisayama Research Institute for Lifestyle Diseases, Hisayama, Japan.

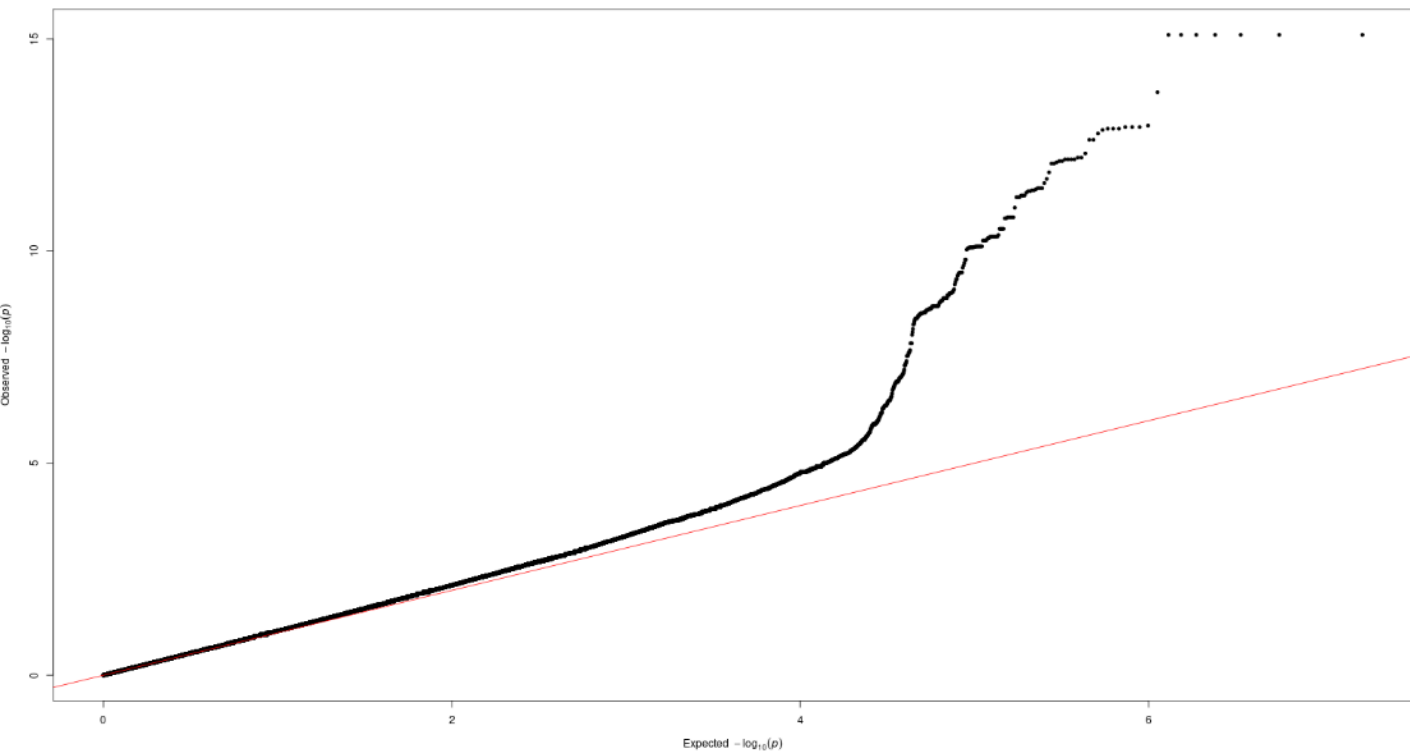

**Supplementary Figure 1. Quantile-Quantile plot.**  
Quantile-Quantile plot of JPSC-AD GWAS p-values.

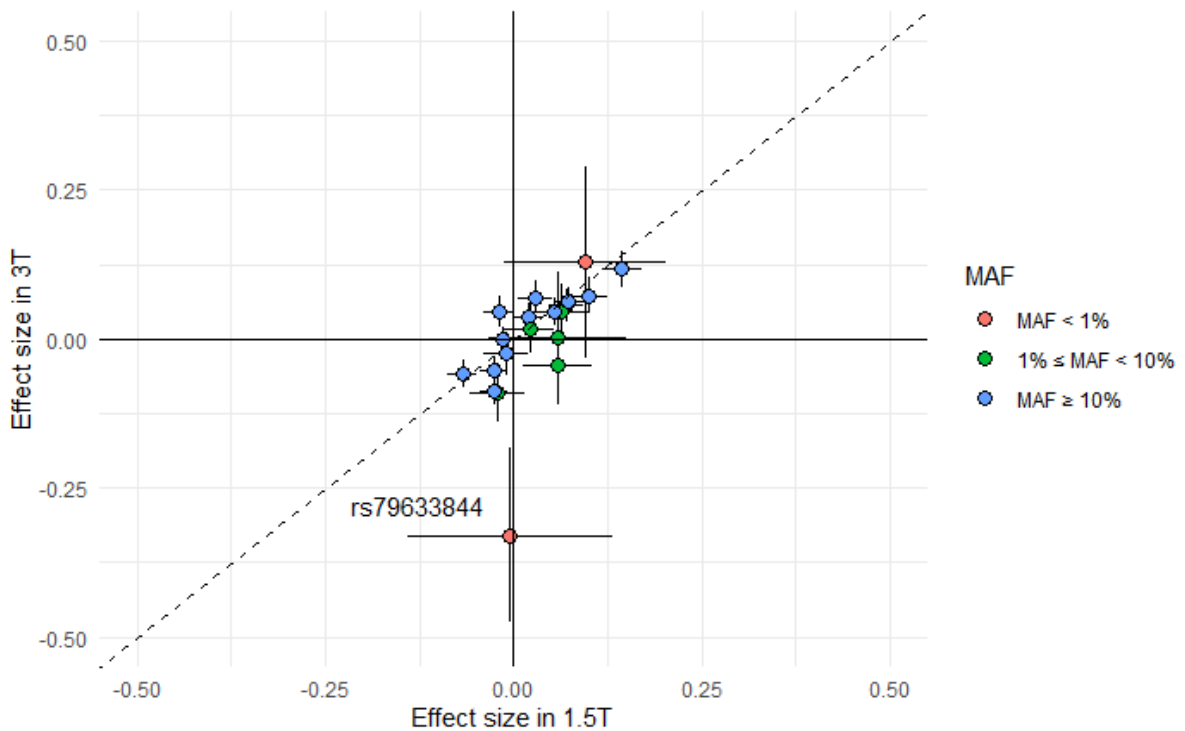

## Supplementary Figure 2. Comparison of effect sizes of variants on WML between 1.5T and 3T.

The horizontal axis indicates effect sizes of variants on WML in individuals evaluated by 1.5T (N=6,229), and the vertical axis indicates effect sizes of variants in individuals evaluated by 3.0T (N=3,250). Error bars indicate standard error of the mean.

**a** JPSC-AD

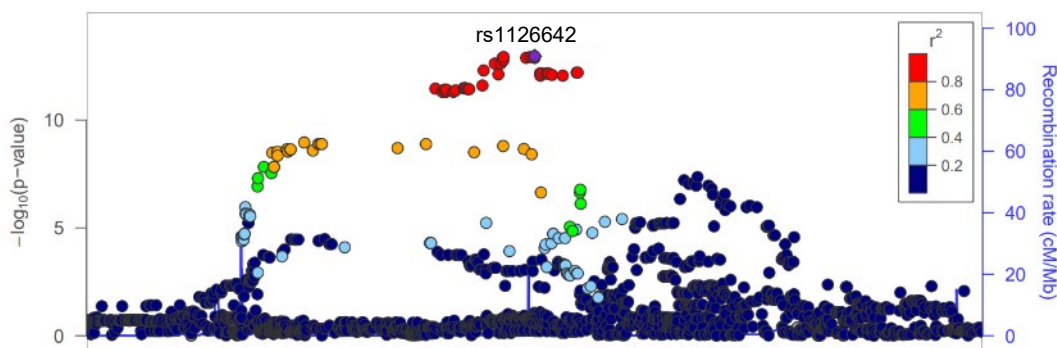

**b** Conditioned by rs1126642

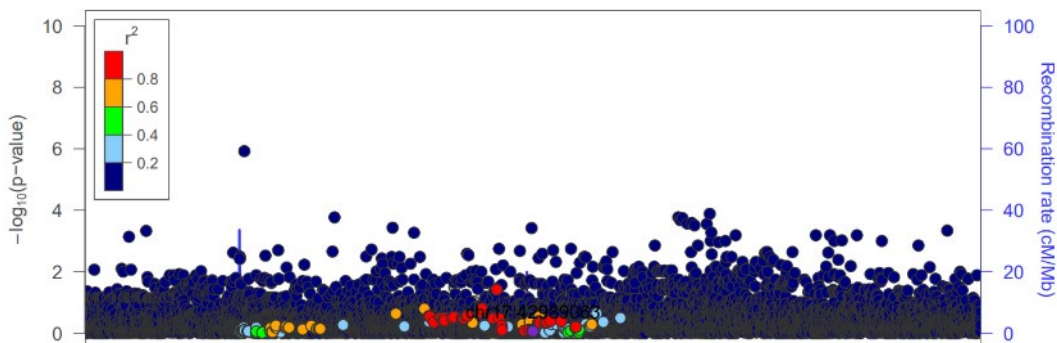

**c** Conditioned by rs4525538

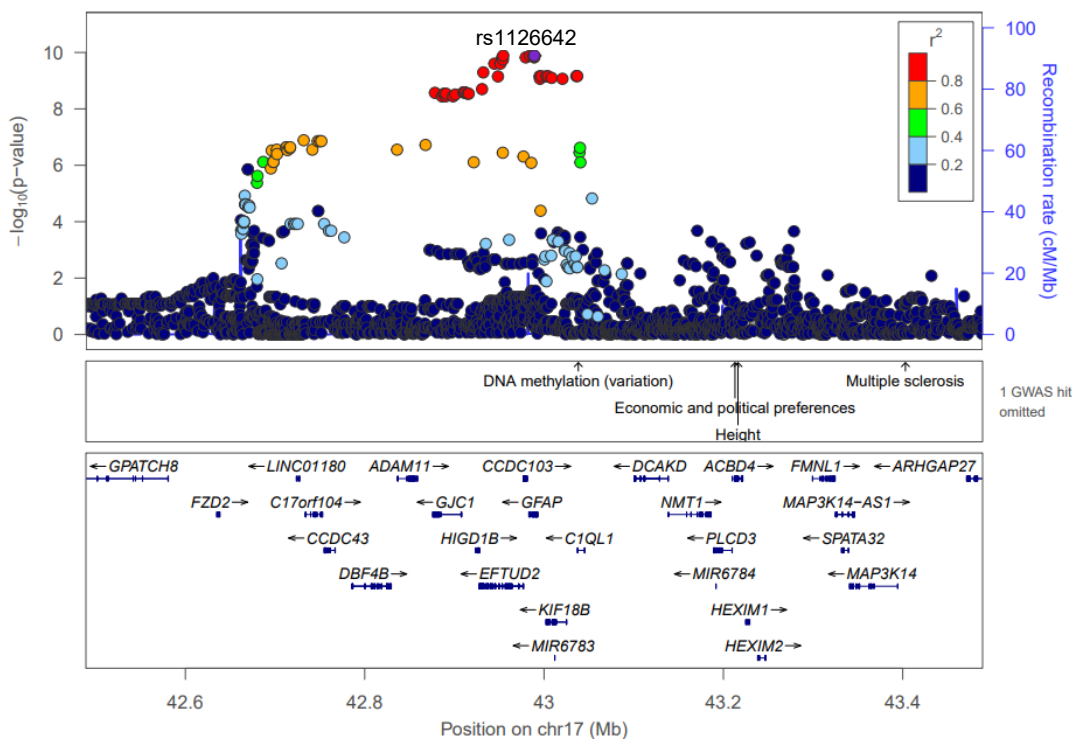

### Supplementary Figure 3. Regional association plots for the region around *GFAP*.

Panel **a** shows a plot of the JPSC-AD results. The results of condition analysis adjusted by **b** rs1126642, the lead variant of JPSC-AD, and **c** rs4525538, the lead variant of UK Biobank, are shown.

**a** JPSC-AD

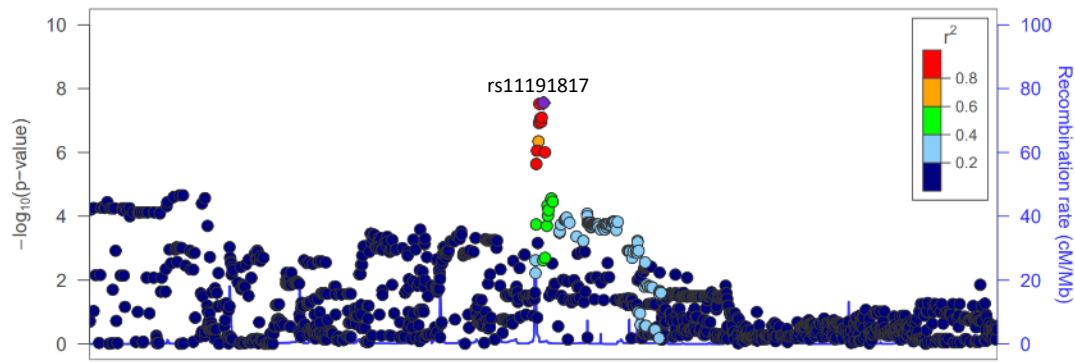

**b** Conditioned by rs11191817

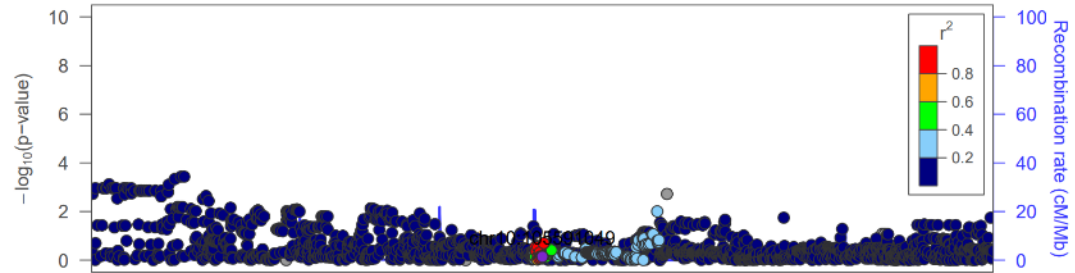

**c** Conditioned by rs4630220

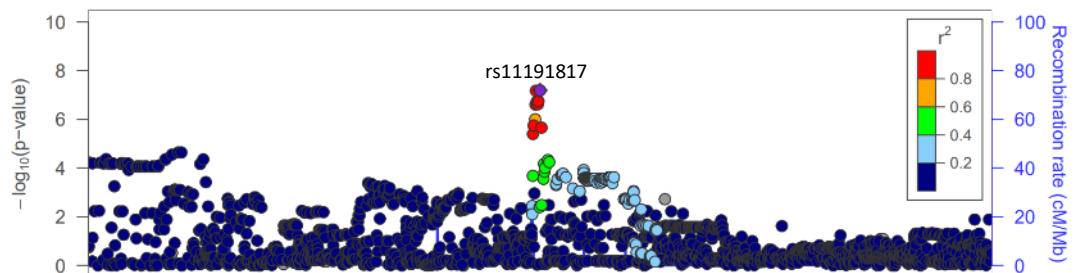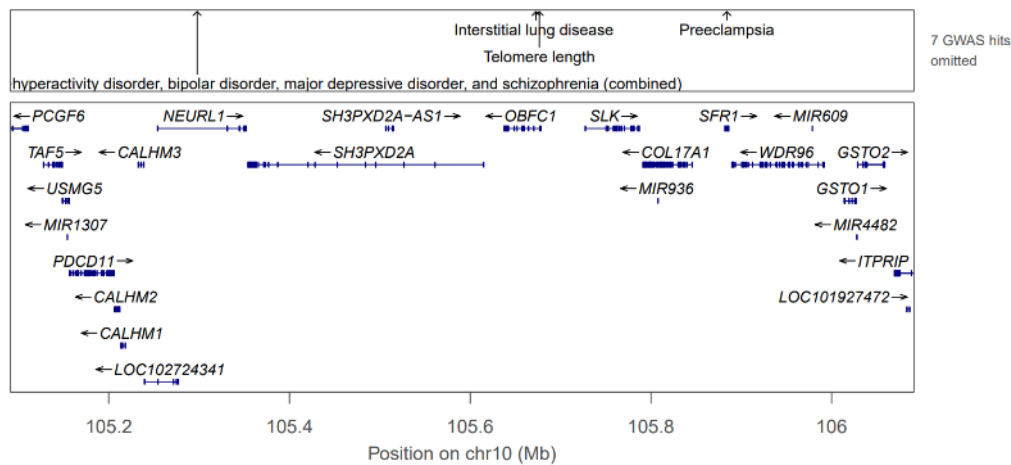

## Supplementary Figure 4. Regional association plots for the region around *SH3PXD2A*.

Panel **a** shows a plot of the JPSC-AD results. The results of condition analysis adjusted by **b** rs1191817, the lead variant of JPSC-AD, and **c** rs4630220, the lead variant of UK Biobank, are shown.

**a JPSC-AD**

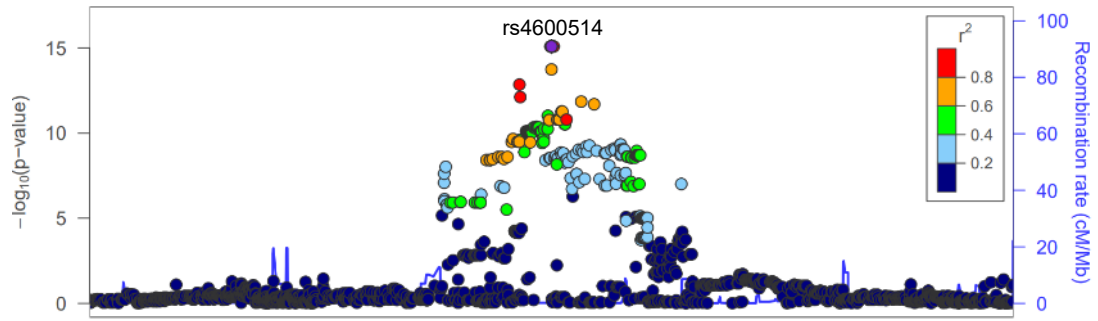

**b Conditioned by rs4600514**

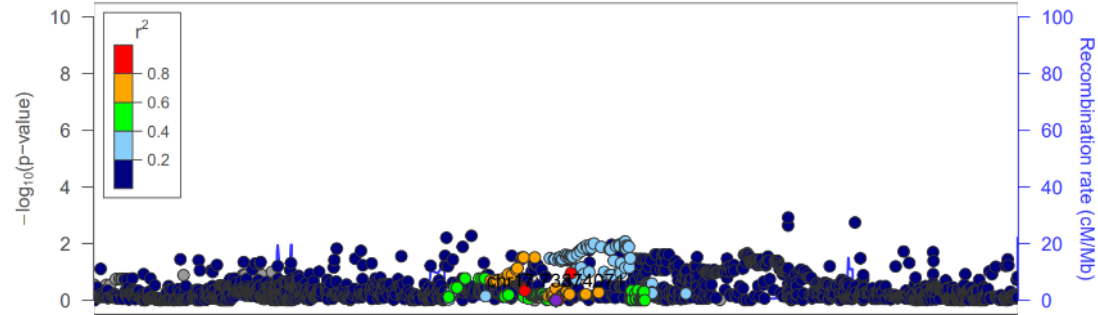

**c Conditioned by rs3744020**

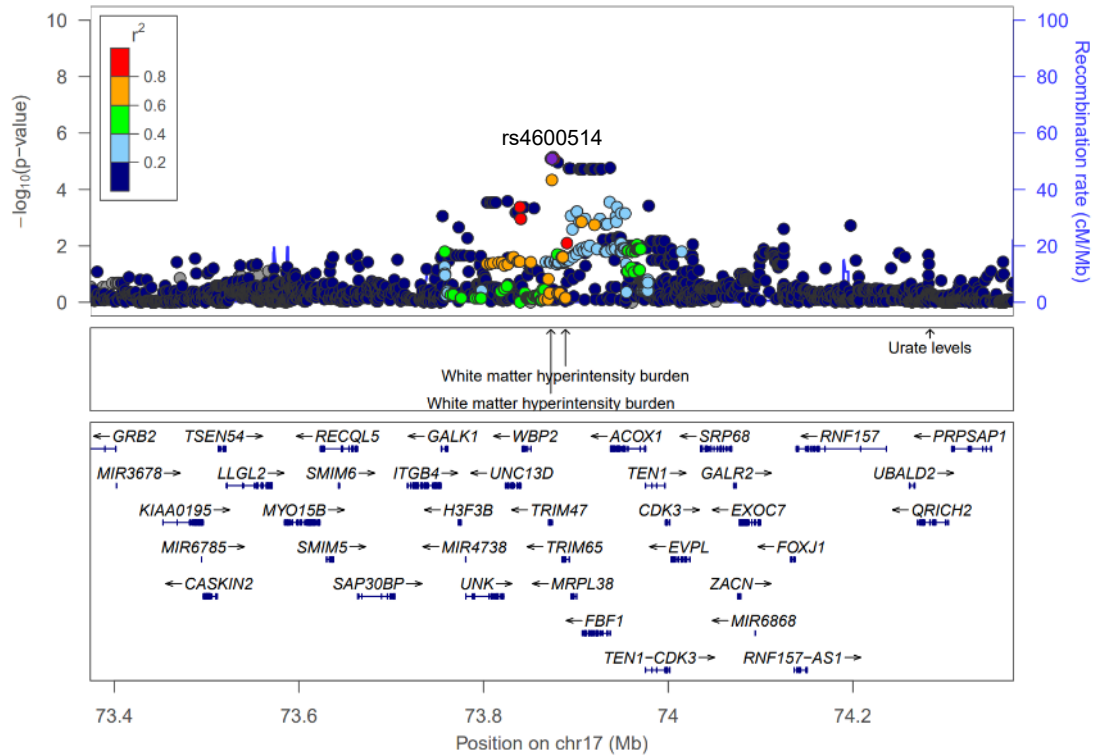

## Supplementary Figure 5. Regional association plots for the region around *TRIM47*.

Panel **a** shows a plot of the JPSC-AD results. The results of condition analysis adjusted by **b** rs4600514, the lead variant of JPSC-AD, and **c** rs3744020, the lead variant of UK Biobank, are shown.



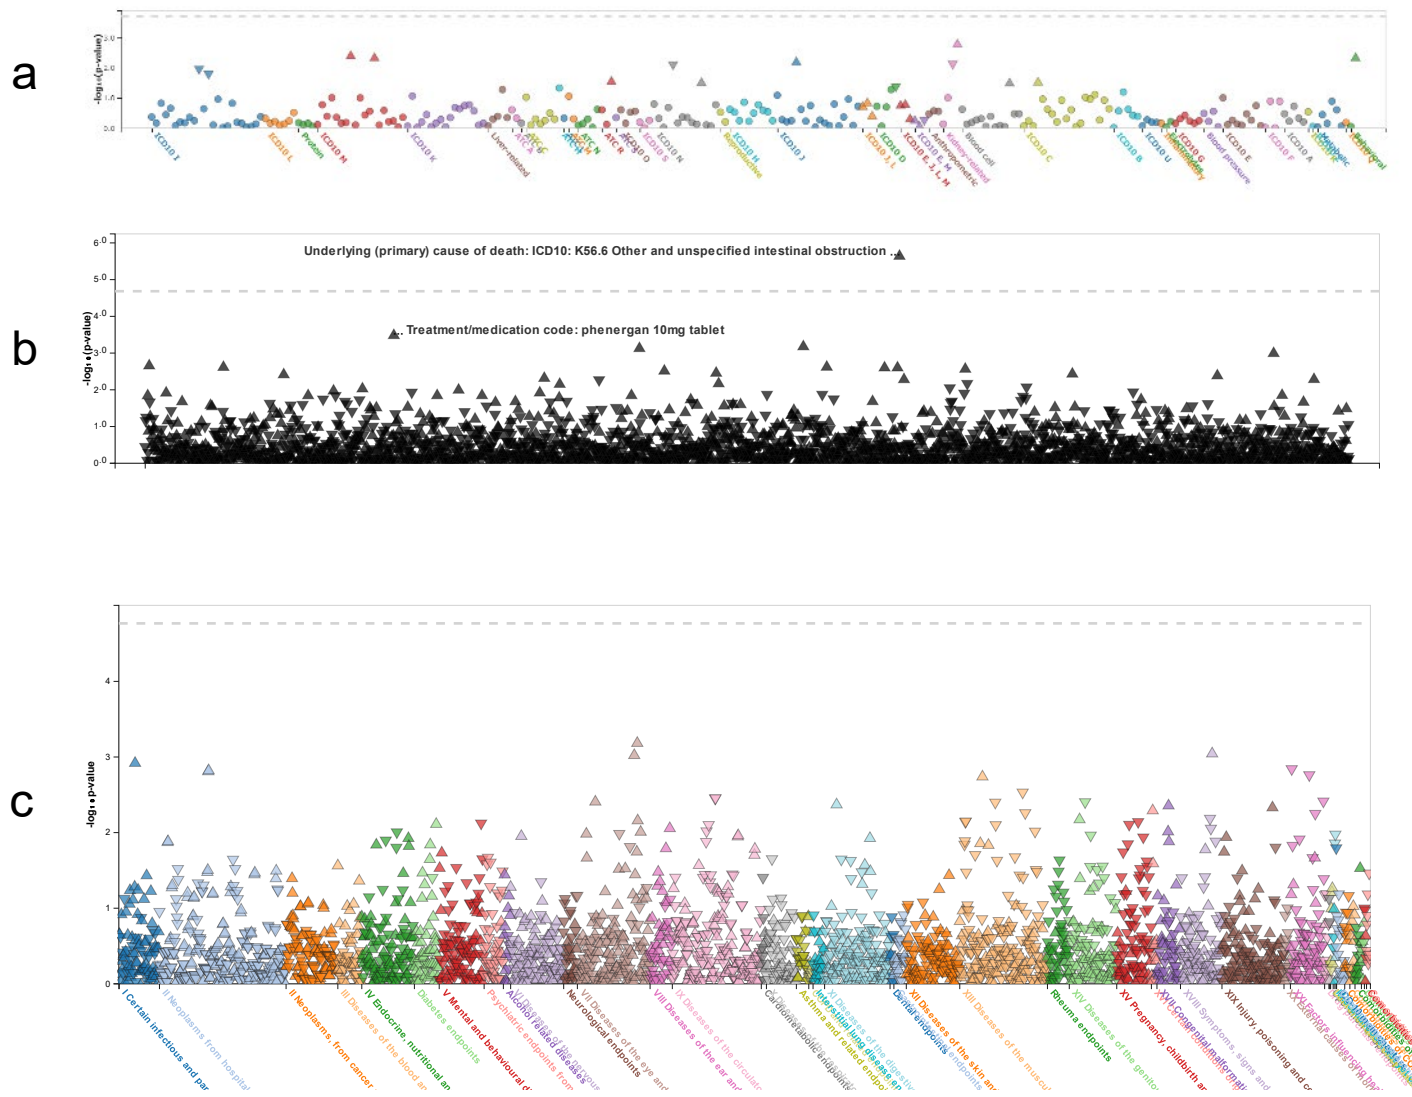

## Supplementary Figure 6. PheWAS plot for rs1126642 in three large biobanks.

**a** Biobank Japan, **b** UK Biobank, and **c** FinnGen. The solid horizontal lines indicate PheWAS significance levels and the dotted horizontal lines indicate suggestive levels.

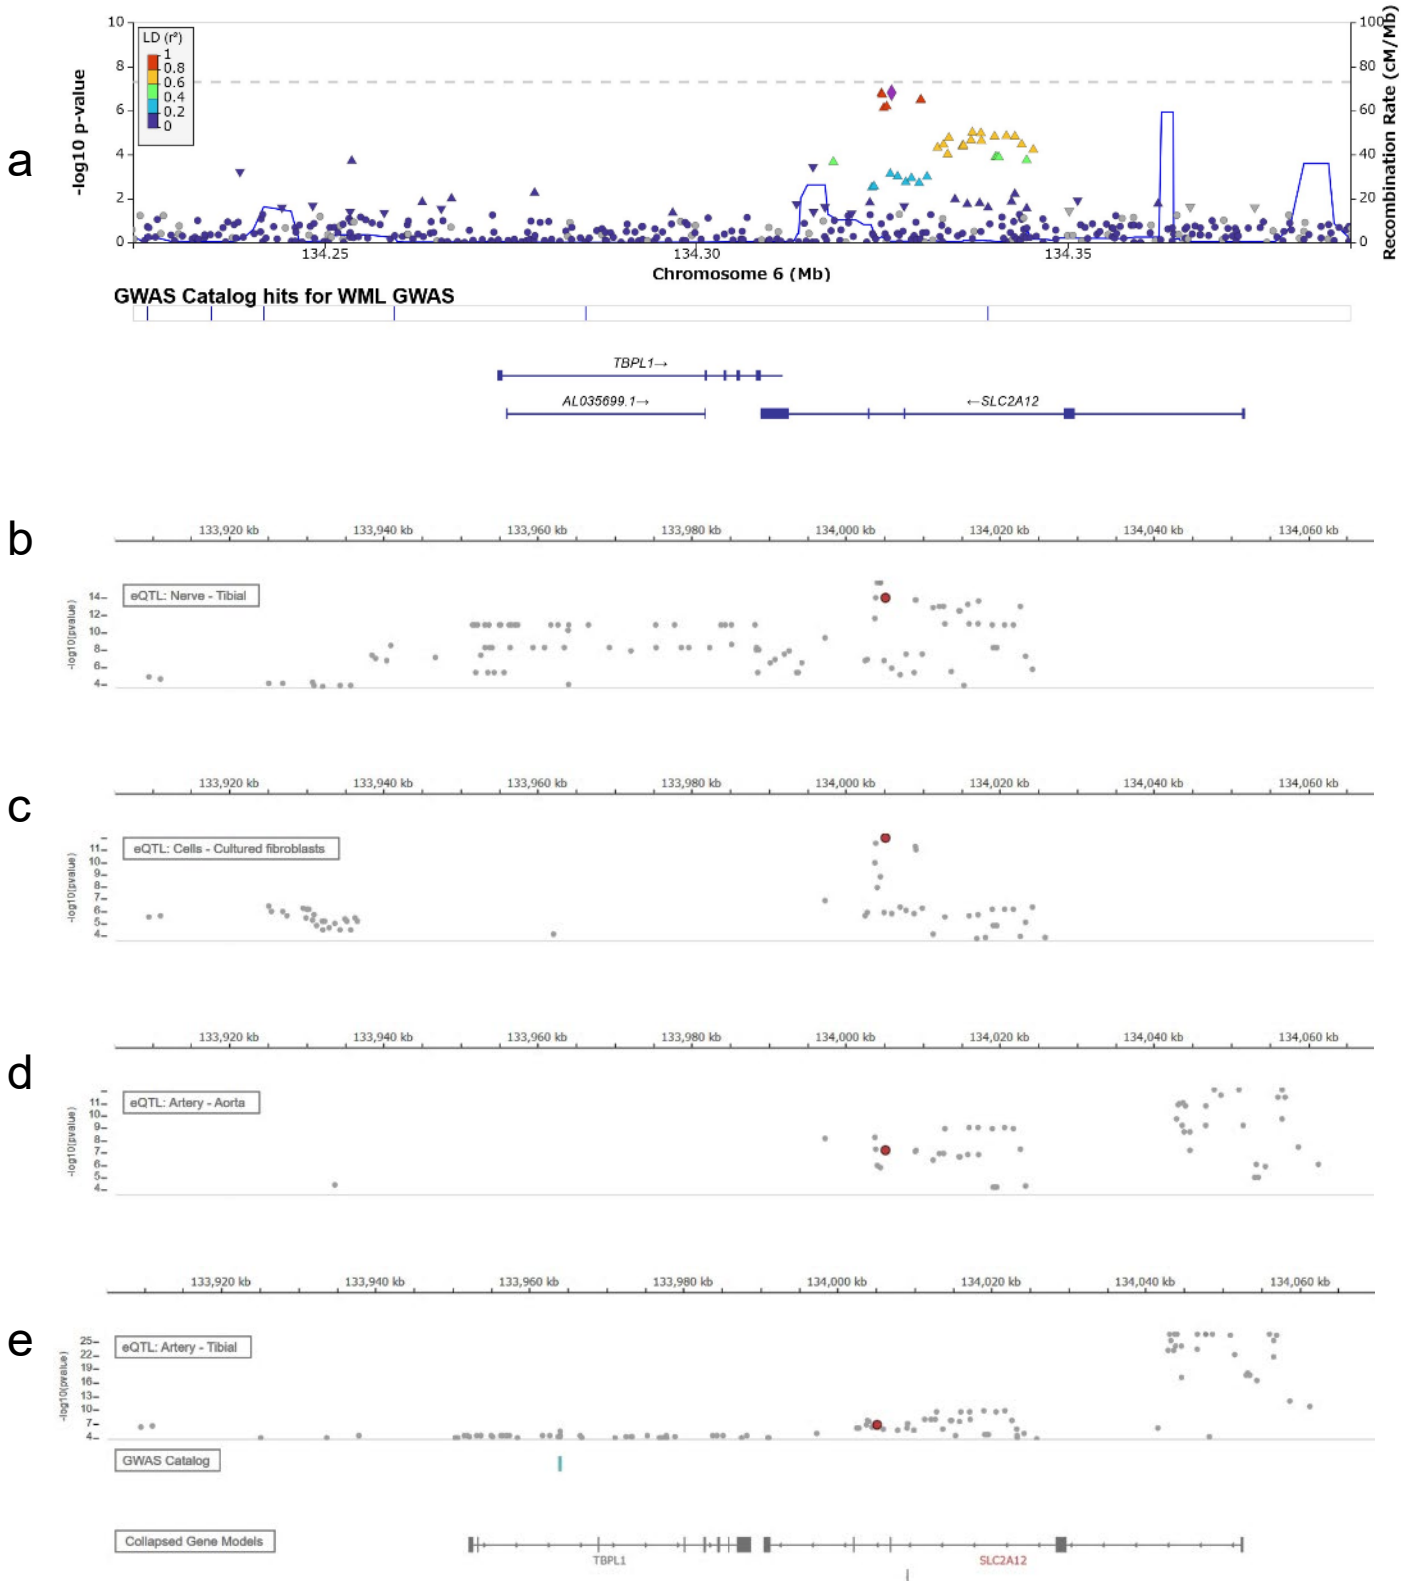

## Supplementary Figure 7. Regional association plot and eQTL plot around *SLC2A12*.

**a** Regional association plot around *SLC2A12* of UK Biobank. The purple diamond indicates rs12202497, the lead variant of UK Biobank. The eQTL results for *SLC2A12* in the GTEx project are shown for **b** Nerve–Tibial, **c** Cells–Cultured fibroblasts, **d** Artery–Aorta and **e** Artery–Tibial. The red dots indicate rs1002559.

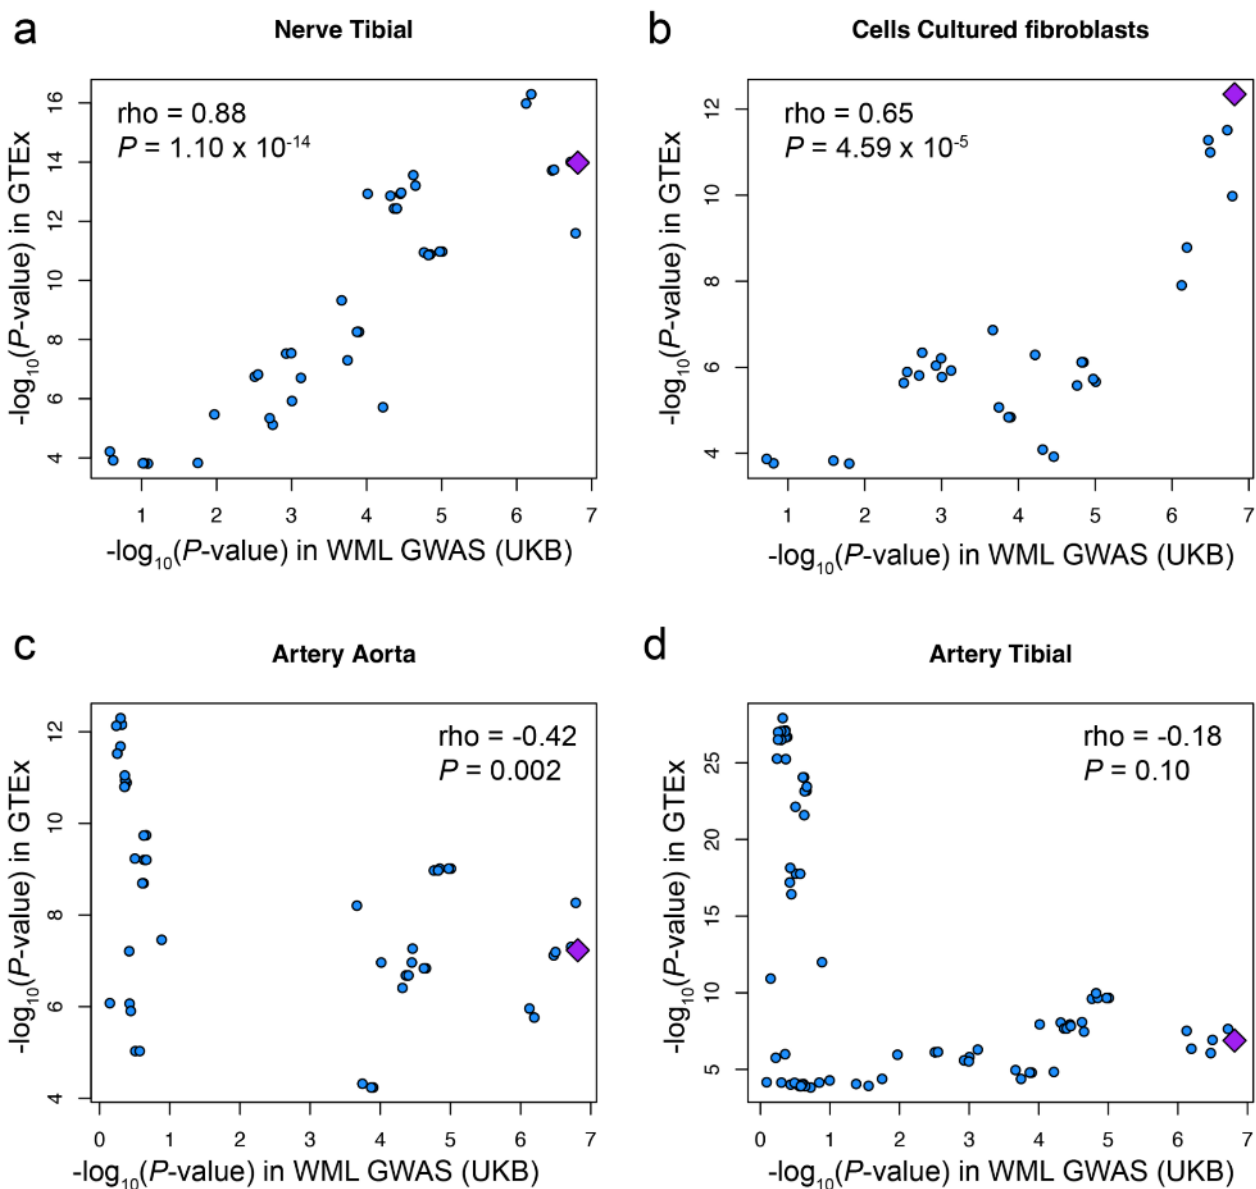

### Supplementary Figure 8. Colocalization analysis.

We tried to evaluate colocalization of associated variants in the GWAS of white matter lesions (X-axis) and eQTL of *SLC2A12* (Y-axis) in three tissues and one cell-type in GTEx (v8) including **a** Nerve–Tibial, **b** Cells–Cultured fibroblasts, **c** Artery–Aorta and **d** Artery–Tibial. The purple diamonds indicate rs1002559. We selected the variants which were included in both datasets.

Supplementary Table 1. Baseline characteristics of the JPSC-AD participants, 2017.

|                                      | JPSC-AD      | UK Biobank |
|--------------------------------------|--------------|------------|
| Sample size                          | 9,479        | 33,224     |
| Female (%)                           | 57.6         | 52.4       |
| Age (years)                          | 72.9 (6.6)   | 64.2       |
| Systolic blood pressure (mmHg)       | 139.8 (18.6) | n/a        |
| Diastolic blood pressure (mmHg)      | 78.4 (11.5)  | n/a        |
| Antihypertensive drug (%)            | 49.4         | n/a        |
| Hypertension (%)                     | 73           | n/a        |
| Body mass index (kg/m <sup>2</sup> ) | 23.4 (3.3)   | n/a        |
| Diabetes mellitus (%)                | 16           | n/a        |
| Serum total cholesterol (mg/dL)      | 207.5 (36.5) | n/a        |
| Lipid lowering drug (%)              | 28.8         | n/a        |
| Current drinking (%)                 | 43.3         | n/a        |
| Current smoking (%)                  | 8.3          | n/a        |
| Regular exercise (%)                 | 42           | n/a        |
| History of stroke (%)                | 5            | n/a        |
| Dementia (%)                         | 4.2          | n/a        |

Values are shown as means (SD) or frequencies.

Supplementary Table 2. Comparison of effect sizes of variants on WML between 1.5T and 3T.

| SNP              | rs ID      | 1.5T   |       |       | 3T     |       |       | <i>P</i> for heterogeneity | q value |
|------------------|------------|--------|-------|-------|--------|-------|-------|----------------------------|---------|
|                  |            | Beta   | SE    | MAF   | Beta   | SE    | MAF   |                            |         |
| 6:134326285:T:C  | rs1002559  | 0.03   | 0.023 | 0.224 | 0.07   | 0.028 | 0.220 | 0.262                      | 0.871   |
| 2:43104975:C:T   | rs62137163 | 0.095  | 0.108 | 0.007 | 0.129  | 0.161 | 0.005 | 0.857                      | 0.902   |
| 2:56150864:C:T   | rs3762515  | 0.059  | 0.045 | 0.044 | -0.043 | 0.056 | 0.043 | 0.156                      | 0.782   |
| 2:188221793:T:C  | rs36146505 | -0.022 | 0.037 | 0.070 | -0.09  | 0.049 | 0.058 | 0.264                      | 0.871   |
| 2:203683990:A:G  | rs79633844 | -0.005 | 0.136 | 0.005 | -0.329 | 0.147 | 0.006 | 0.106                      | 0.704   |
| 3:183373567:A:G  | rs10470355 | -0.026 | 0.019 | 0.381 | -0.086 | 0.024 | 0.382 | 0.049                      | 0.564   |
| 5:82862328:G:GA  | rs35544841 | -0.019 | 0.021 | 0.272 | 0.045  | 0.026 | 0.265 | 0.056                      | 0.564   |
| 6:151020020:A:T  | rs12202497 | 0.02   | 0.019 | 0.348 | 0.037  | 0.024 | 0.338 | 0.595                      | 0.871   |
| 8:8729761:G:C    | rs907183   | 0.07   | 0.023 | 0.215 | 0.057  | 0.028 | 0.222 | 0.712                      | 0.871   |
| 8:11860251:T:G   | rs10103228 | 0.064  | 0.036 | 0.072 | 0.047  | 0.045 | 0.068 | 0.758                      | 0.871   |
| 10:105599770:T:G | rs11191822 | -0.068 | 0.02  | 0.342 | -0.058 | 0.024 | 0.365 | 0.762                      | 0.871   |
| 10:127675607:A:C | rs3812683  | 0.055  | 0.019 | 0.397 | 0.047  | 0.023 | 0.420 | 0.784                      | 0.871   |
| 13:111040681:G:A | rs11838776 | 0.021  | 0.034 | 0.082 | 0.017  | 0.041 | 0.085 | 0.939                      | 0.939   |
| 16:51442679:C:T  | rs1948948  | -0.01  | 0.03  | 0.111 | -0.024 | 0.036 | 0.116 | 0.758                      | 0.871   |
| 16:87237568:C:T  | rs12928520 | 0.099  | 0.026 | 0.156 | 0.073  | 0.031 | 0.153 | 0.519                      | 0.871   |
| 17:19194812:G:A  | rs1969161  | 0.059  | 0.091 | 0.010 | 0.002  | 0.111 | 0.011 | 0.69                       | 0.871   |
| 17:43141966:A:G  | rs4525538  | 0.073  | 0.019 | 0.388 | 0.063  | 0.023 | 0.386 | 0.762                      | 0.871   |
| 17:73871773:G:A  | rs3744020  | 0.144  | 0.026 | 0.157 | 0.117  | 0.031 | 0.158 | 0.498                      | 0.871   |
| X:13808841:A:G   | rs6527976  | -0.026 | 0.019 | 0.237 | -0.052 | 0.022 | 0.252 | 0.36                       | 0.871   |
| X:152601840:C:T  | rs5970447  | -0.015 | 0.017 | 0.316 | -0.001 | 0.02  | 0.336 | 0.584                      | 0.871   |

Supplementary Table 3. Result from summary statistics of the CHARGE Consortium.

| Chr:Pos                     | Lead variant | Nearest gene    | Meta <i>P</i> | CHARGE <i>P</i> |
|-----------------------------|--------------|-----------------|---------------|-----------------|
| Variants listed in Table 1. |              |                 |               |                 |
| 17:42989063                 | rs1126642    | <i>GFAP</i>     | 7.95E-09      | 1.72E-04        |
| 17:73874071                 | rs4600514    | <i>TRIM47</i>   | 2.43E-56      | 1.19E-15        |
| Variants listed in Table 2. |              |                 |               |                 |
| 2:43104975                  | rs62137163   | <i>HAAO</i>     | 2.10E-09      | 2.25E-04        |
| 2:56150864                  | rs3762515    | <i>EFEMP1</i>   | 9.05E-26      | 6.33E-04        |
| 2:188221793                 | rs36146505   | <i>CALCRL</i>   | 3.67E-08      | 7.11E-05        |
| 2:203683990                 | rs79633844   | <i>ICA1L</i>    | 2.18E-09      | 4.12E-07        |
| 6:151020020                 | rs12202497   | <i>PLEKHG1</i>  | 6.48E-18      | 2.01E-05        |
| 10:105599770                | rs11191822   | <i>SH3PXD2A</i> | 3.17E-13      | 1.04E-04        |
| 13:111040681                | rs11838776   | <i>COL4A2</i>   | 1.74E-10      | 2.34E-06        |
| 16:87237568                 | rs12928520   | <i>C16orf95</i> | 1.02E-21      | 1.62E-06        |
| 17:73871773                 | rs3744020    | <i>TRIM47</i>   | 3.23E-57      | 6.48E-18        |

Supplementary Table 4. Linkage disequilibrium between the lead variants of the JPSC-AD and UK Biobank.

| Chromosome | Region          | Lead variant |            |                  | LD ( $r^2$ ) |       |
|------------|-----------------|--------------|------------|------------------|--------------|-------|
|            |                 | JPSC-AD      | UK Biobank | Distance<br>(BP) | JPN          | EUR   |
|            |                 | rsID         | rsID       |                  | (1KGP)       |       |
| 17         | <i>GFAP</i>     | rs1126642    | rs4525538  | 152903           | 0.074        | 0.003 |
| 10         | <i>SX3PDX2A</i> | rs11191817   | rs4630220  | 131933           | 0.011        | 0     |
| 6          | <i>PLEKHG1</i>  | rs34773629   | rs12202497 | 195710           | 0.006        | 0.03  |

Abbreviations: LD, linkage disequilibrium; JPN, Japanese; EUR (1KGP), European population of the 1000 Genomes Project; BP, base pairs.

Supplementary Table 5. In silico prediction results of nonsynonymous variants in LD with the lead variants of JPSC-AD and meta-GWAS.

| Lead variant | Gene          | rsID      | Chr:BP:Ref:Alt  | r <sup>2</sup> JPSC | r <sup>2</sup> EUR | Annotation     | SIFT                          | REVEL | CADD | Polyphen                        |
|--------------|---------------|-----------|-----------------|---------------------|--------------------|----------------|-------------------------------|-------|------|---------------------------------|
| JPSC-AD GWAS |               |           |                 |                     |                    |                |                               |       |      |                                 |
| rs1126642    | <i>GFAP</i>   | rs1126642 | 17:42989063:C:T | 1                   | 1                  | GFAP:p.D295N   | Deleterious                   | 0.507 | 29.3 | Possibly / probably<br>damaging |
| rs4600514    | <i>TRIM47</i> | rs4600514 | 17:73874071:G:A | 1                   | 1                  | TRIM47:p.R187W | Deleterious                   | 0.172 | 29.9 | Probably damaging               |
| Meta-GWAS    |               |           |                 |                     |                    |                |                               |       |      |                                 |
| rs36146505   | <i>CALCRL</i> | rs7586970 | 2:188343497:T:C | 0.955               | 0.752              | TFPI:p.N221S   | Tolerated                     | 0.12  | 19.9 | Benign                          |
| rs1969161    | <i>EPN2</i>   | rs7221577 | 17:19246867:T:C | 0.959               | n/a                | B9D1:p.Y256C   | Deleterious low<br>confidence | n/a   | 1.83 | Possibly damaging               |

Abbreviations: LD, linkage disequilibrium; GWAS, genome-wide association study; Chr, chromosome; Pos, position; Ref, reference allele; Alt, alternative allele; SIFT, Sorting Intolerant From Tolerant; REVEL, Rare Exome Variant Ensemble Learner; CADD, Combined Annotation Dependent Depletion.



Supplementary Table 6. Genetic correlation between WML and traits reported as significant in the previous report.

| Traits                   | JPSC-AD and Biobank Japan |       |          | UK Biobank |       |          |
|--------------------------|---------------------------|-------|----------|------------|-------|----------|
|                          | $r_g$                     | SE    | $P$      | $r_g$      | SE    | $P$      |
| Ischemic stroke          | 0.511                     | 0.121 | 2.48E-05 | 0.319      | 0.053 | 1.78E-09 |
| Systolic blood pressure  | 0.020                     | 0.091 | 0.83     | 0.123      | 0.035 | 4.00E-04 |
| Diastolic blood pressure | -0.104                    | 0.088 | 0.24     | 0.157      | 0.031 | 4.62E-07 |
| Body mass index*         | -0.017                    | 0.055 | 0.76     | 0.191      | 0.055 | 5.00E-04 |
| Smoking (ever vs never)  | 0.101                     | 0.080 | 0.21     | 0.256      | 0.059 | 1.46E-05 |

\* Extreme BMI for UK Biobank.

Supplementary Table 7. Comparison of genotyping, quality controls methods and phenotype calculation between JPSC-AD and UK Biobank.

|                            | <b>JPSC-AD</b>                                                                                                                                                                                                                                                                                                                                                                                                                          | <b>UK biobank</b>                                                                                                                                                                                                                                                                                                                                                                                                                                                                             |
|----------------------------|-----------------------------------------------------------------------------------------------------------------------------------------------------------------------------------------------------------------------------------------------------------------------------------------------------------------------------------------------------------------------------------------------------------------------------------------|-----------------------------------------------------------------------------------------------------------------------------------------------------------------------------------------------------------------------------------------------------------------------------------------------------------------------------------------------------------------------------------------------------------------------------------------------------------------------------------------------|
| Sample size                | 9,479                                                                                                                                                                                                                                                                                                                                                                                                                                   | 33,224                                                                                                                                                                                                                                                                                                                                                                                                                                                                                        |
| Geotyping array            | Illumina Japanese Screening Array.                                                                                                                                                                                                                                                                                                                                                                                                      | The UK Biobank Axiom Array or the UK BiLEVE Axiom Array.                                                                                                                                                                                                                                                                                                                                                                                                                                      |
| Imputation reference panel | Reference panel specified for Japanese population (Akiyama et al. <i>Nat Commun</i> 2019).                                                                                                                                                                                                                                                                                                                                              | Haplotype Reference Consortium (HRC) and a merged UK10K + 1000 Genomes reference panel.                                                                                                                                                                                                                                                                                                                                                                                                       |
| QC for genotype data       | <p>&lt;Sample QCs&gt;</p> <p>Exclusion criteria:</p> <ol style="list-style-type: none"> <li>1. Call rate &lt; 98%.</li> <li>2. Gender discrepancy.</li> </ol> <p>&lt;Variant QCs&gt;</p> <ol style="list-style-type: none"> <li>1. P for HWE &gt; <math>1.0 \times 10^{-6}</math>.</li> <li>2. Call rate &gt;99%.</li> <li>3. Minor allele count &lt;5.</li> <li>4. Allele frequency difference &gt;6% with reference panel.</li> </ol> | <p>&lt;Sample QCs&gt;</p> <ol style="list-style-type: none"> <li>1. PCA-based approach.</li> <li>2. Comprehensive assessment using the metrics of missing rate and heterozygosity adjusted for population structure.</li> <li>3. Gender discrepancy.</li> </ol> <p>&lt;Variant QCs&gt;</p> <ol style="list-style-type: none"> <li>1. Marker-based QC tests to check for consistency across experimental batches.</li> <li>2. Including variants with missing genotypes &lt; 0.97%.</li> </ol> |
| Post-imputation QCs        | <p>&lt;Exclusion criteria&gt;</p> <ol style="list-style-type: none"> <li>1. MAF &lt; 0.5%.</li> <li>2. <math>R_{sq} \leq 0.7</math>.</li> </ol>                                                                                                                                                                                                                                                                                         | <p>&lt;Exclusion criteria&gt;</p> <ol style="list-style-type: none"> <li>3. MAF &lt; 0.1%.</li> <li>4. Imputation information score &lt; 0.3.</li> <li>5. P-value for HWE &lt; <math>10^{-7}</math>.</li> </ol>                                                                                                                                                                                                                                                                               |
| Covariates                 | Sex, age, squared age, estimated total intracranial volume, and facility dummy variables.                                                                                                                                                                                                                                                                                                                                               | Quantile-normalization before association testing. age, sex, imaging confounds, top 40 PCs.                                                                                                                                                                                                                                                                                                                                                                                                   |
